# Supplementary material for: Catalytic polymerization of isoprene using an ultrahigh active iron(ii) complex with an ortho-modified 1,10-phenanthroline ligand, access to a thermal plastic rubber
Source: Royal Society of Chemistry journal article supplement (doi:10.1039/d4py00576g), 2024-01-01
Supplement: d4py00576g1.pdf [file d4py00576g1.pdf]

# Catalytic polymerization of isoprene using a ultrahigh active iron(II) complex with *ortho*-modified 1,10-phenanthroline ligand: access to a thermal plastic rubber

Jiajia Ge, Binghui Chen, Dirong Gong\*

Faculty of Materials Science and Chemical Engineering, Ningbo University, Ningbo 315211, P. R. China.

Corresponding to: [gongdirong@nbu.edu.cn](mailto:gongdirong@nbu.edu.cn)

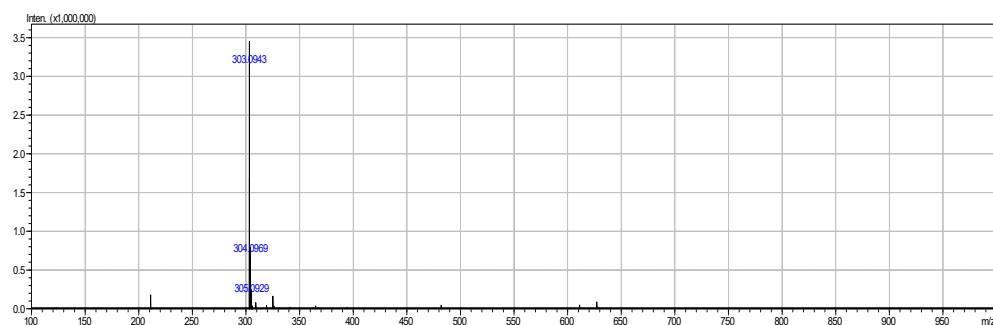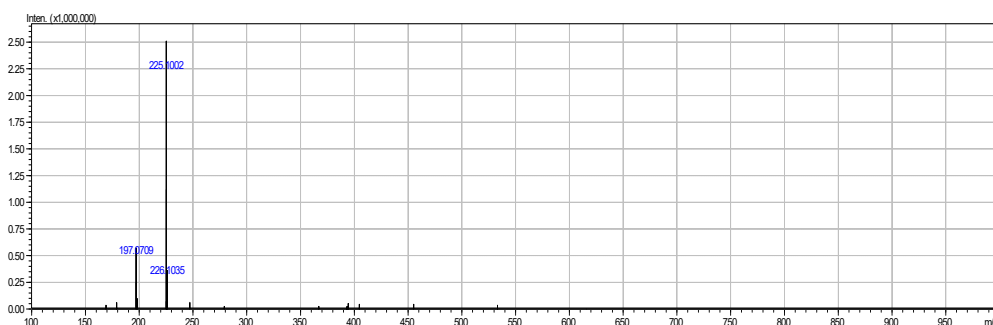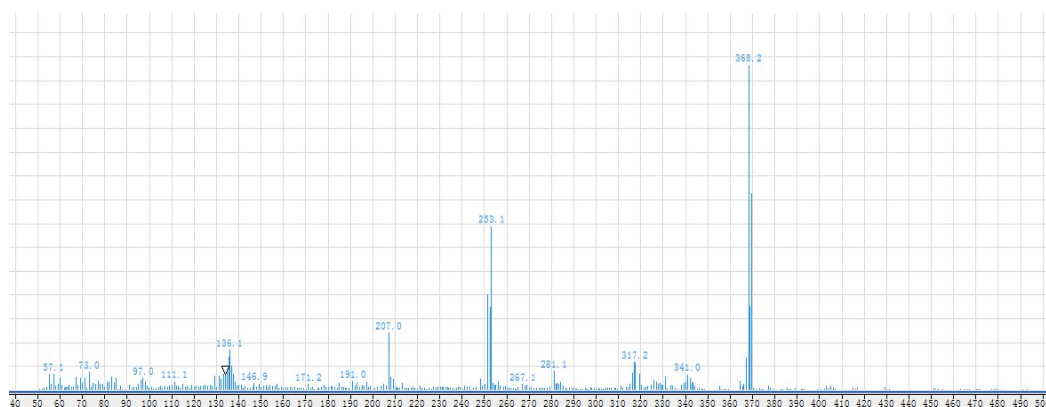

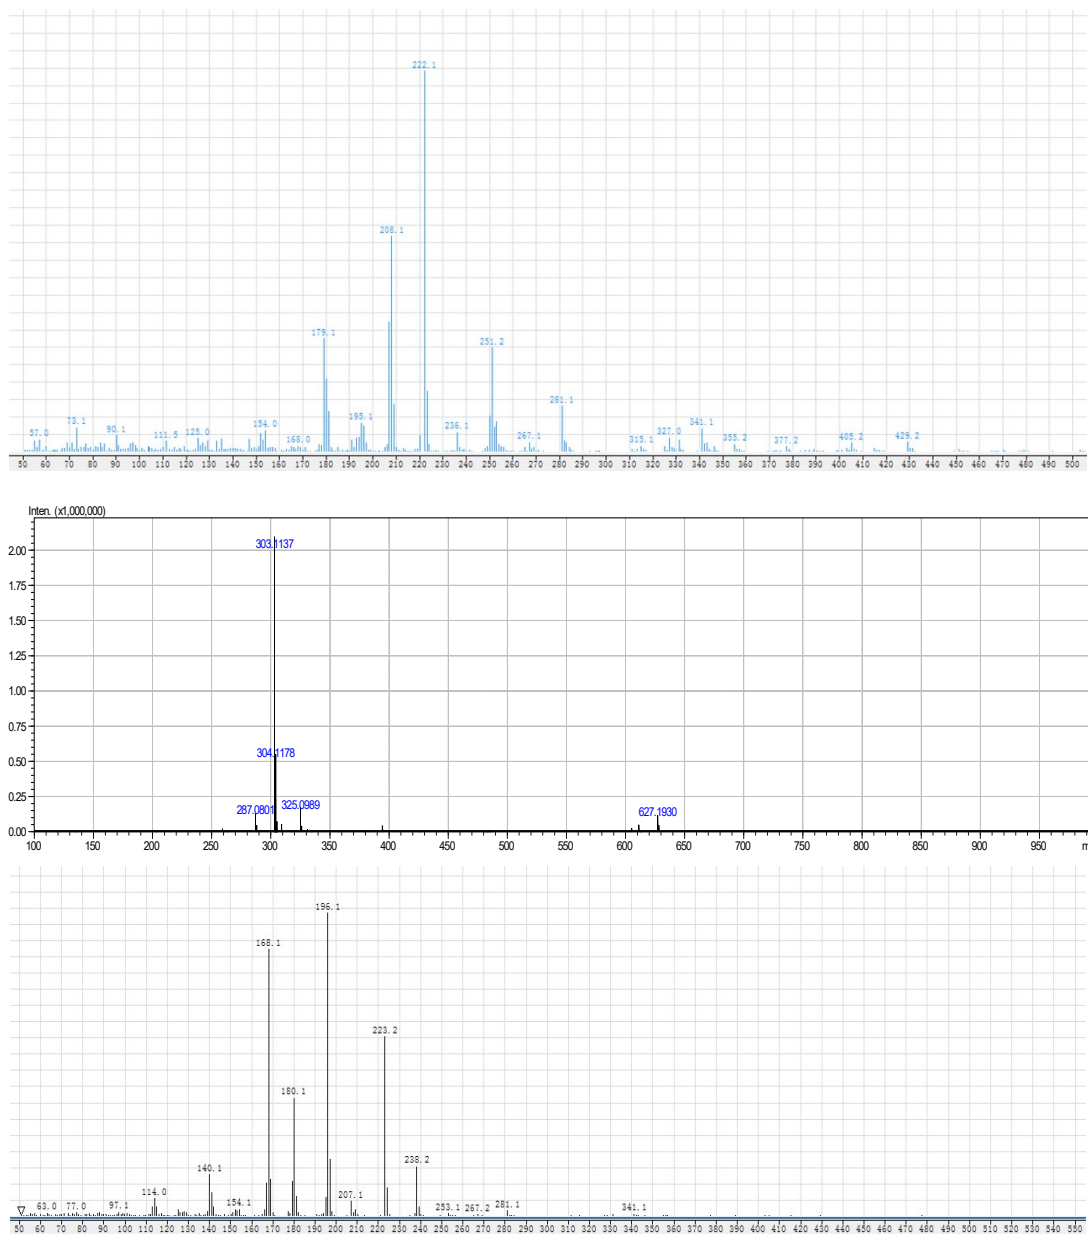

**Fig. 1S** The mass spectrometry of ligand L1-L6

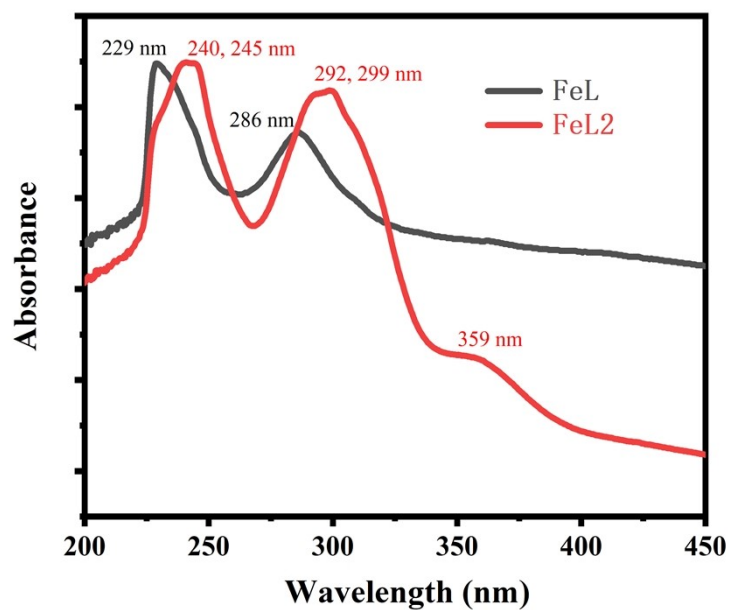

**Fig. 2S** The Uv-visible spectral comparison of FeL and FeL2 (L=L1)

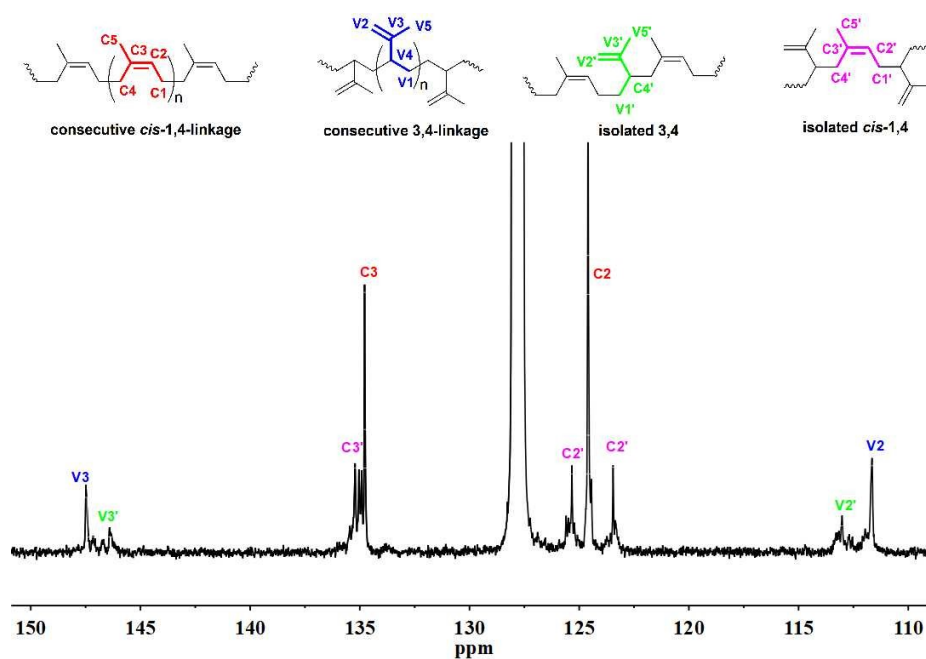

**Fig. 3S** Magnified <sup>13</sup>C NMR spectral (olefinic part) of the polyisoprene (Run 3, 25°C, Table 2 )

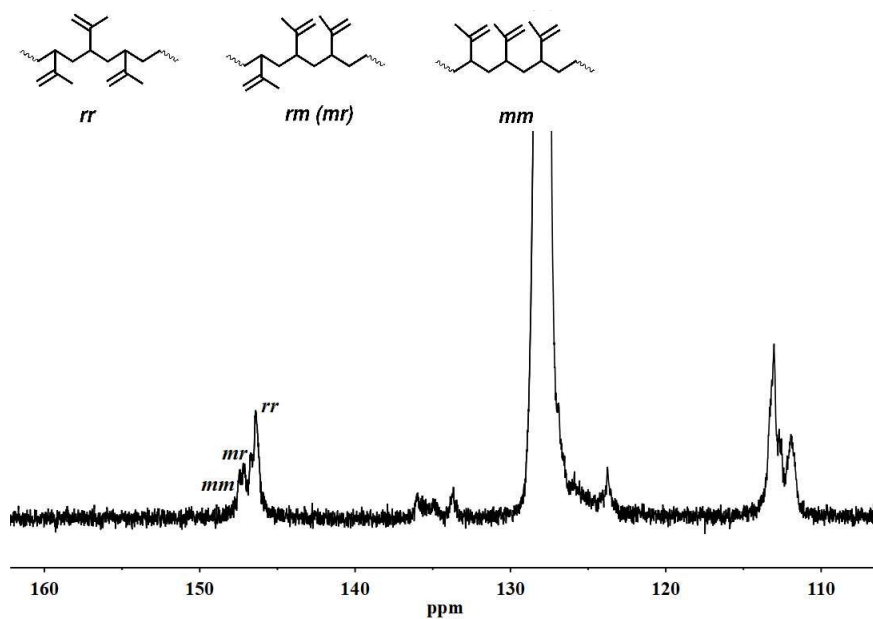

**Fig. 4S** Stereoregularity analysis of  $^{13}\text{C}$  NMR spectral for the polyisoprene obtained at  $-40^\circ\text{C}$ , run 3, Table 2 )

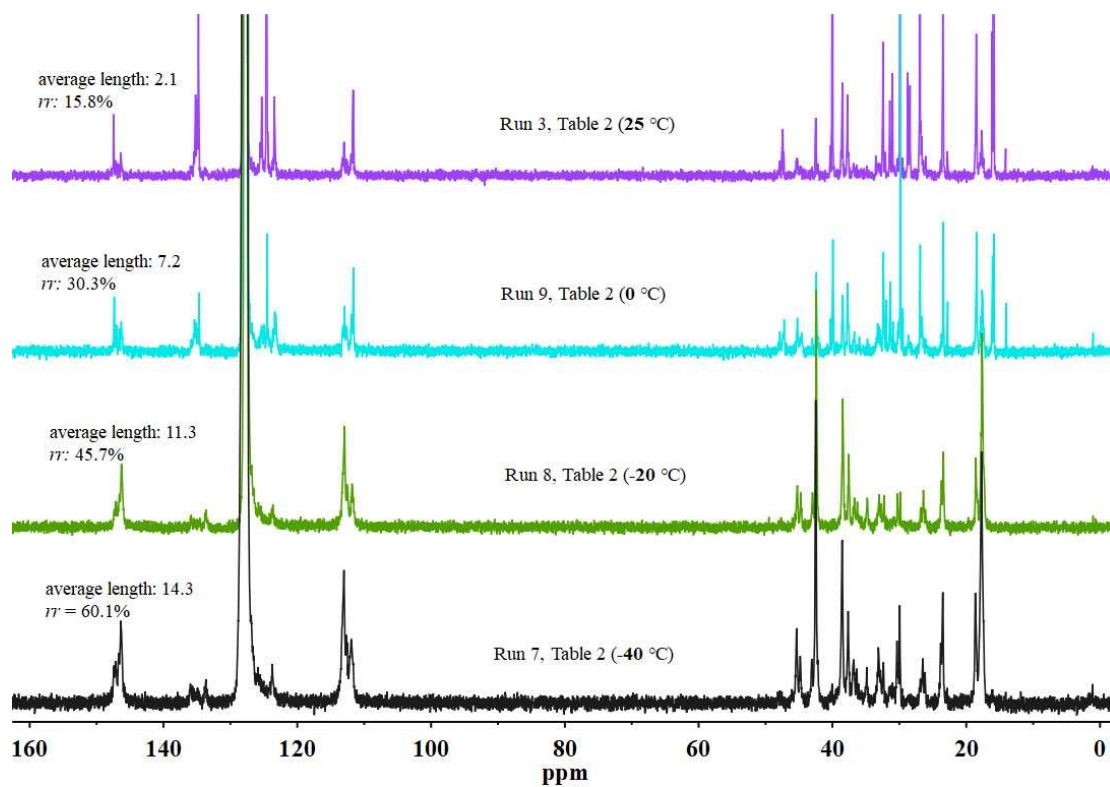

**Fig. 5S** The  $^{13}\text{C}$  NMR of the polyisoprenes obtained from various temperatures ( $25^\circ\text{C}$ ,  $0^\circ\text{C}$ ,  $-20^\circ\text{C}$  and  $-40^\circ\text{C}$ ) as shown in Table 2

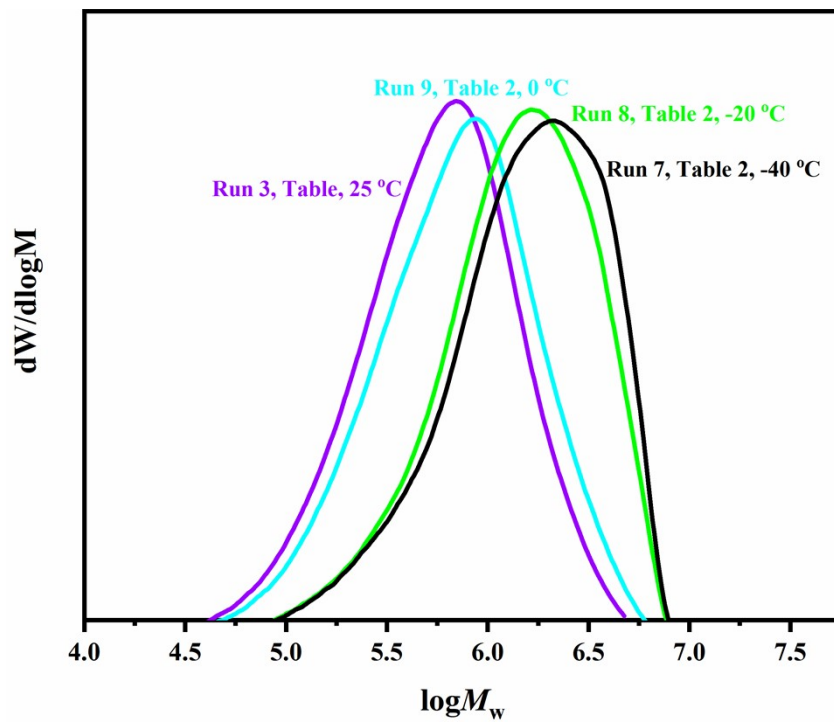

**Fig.6S** Molecular weight of the polyisoprenes obtained from various temperatures (25°C, 0°C, -20°C and -40°C) as shown in Table 2
